# Supplementary material for: Role of CXCL10 in the progression of in situ to invasive carcinoma of the breast
Source: PubMed Central journal article supplement (PMC8429587; doi:10.1038/s41598-021-97390-5), 2021-09-09

# MCF-7 cells (24 hours) - Western Blot

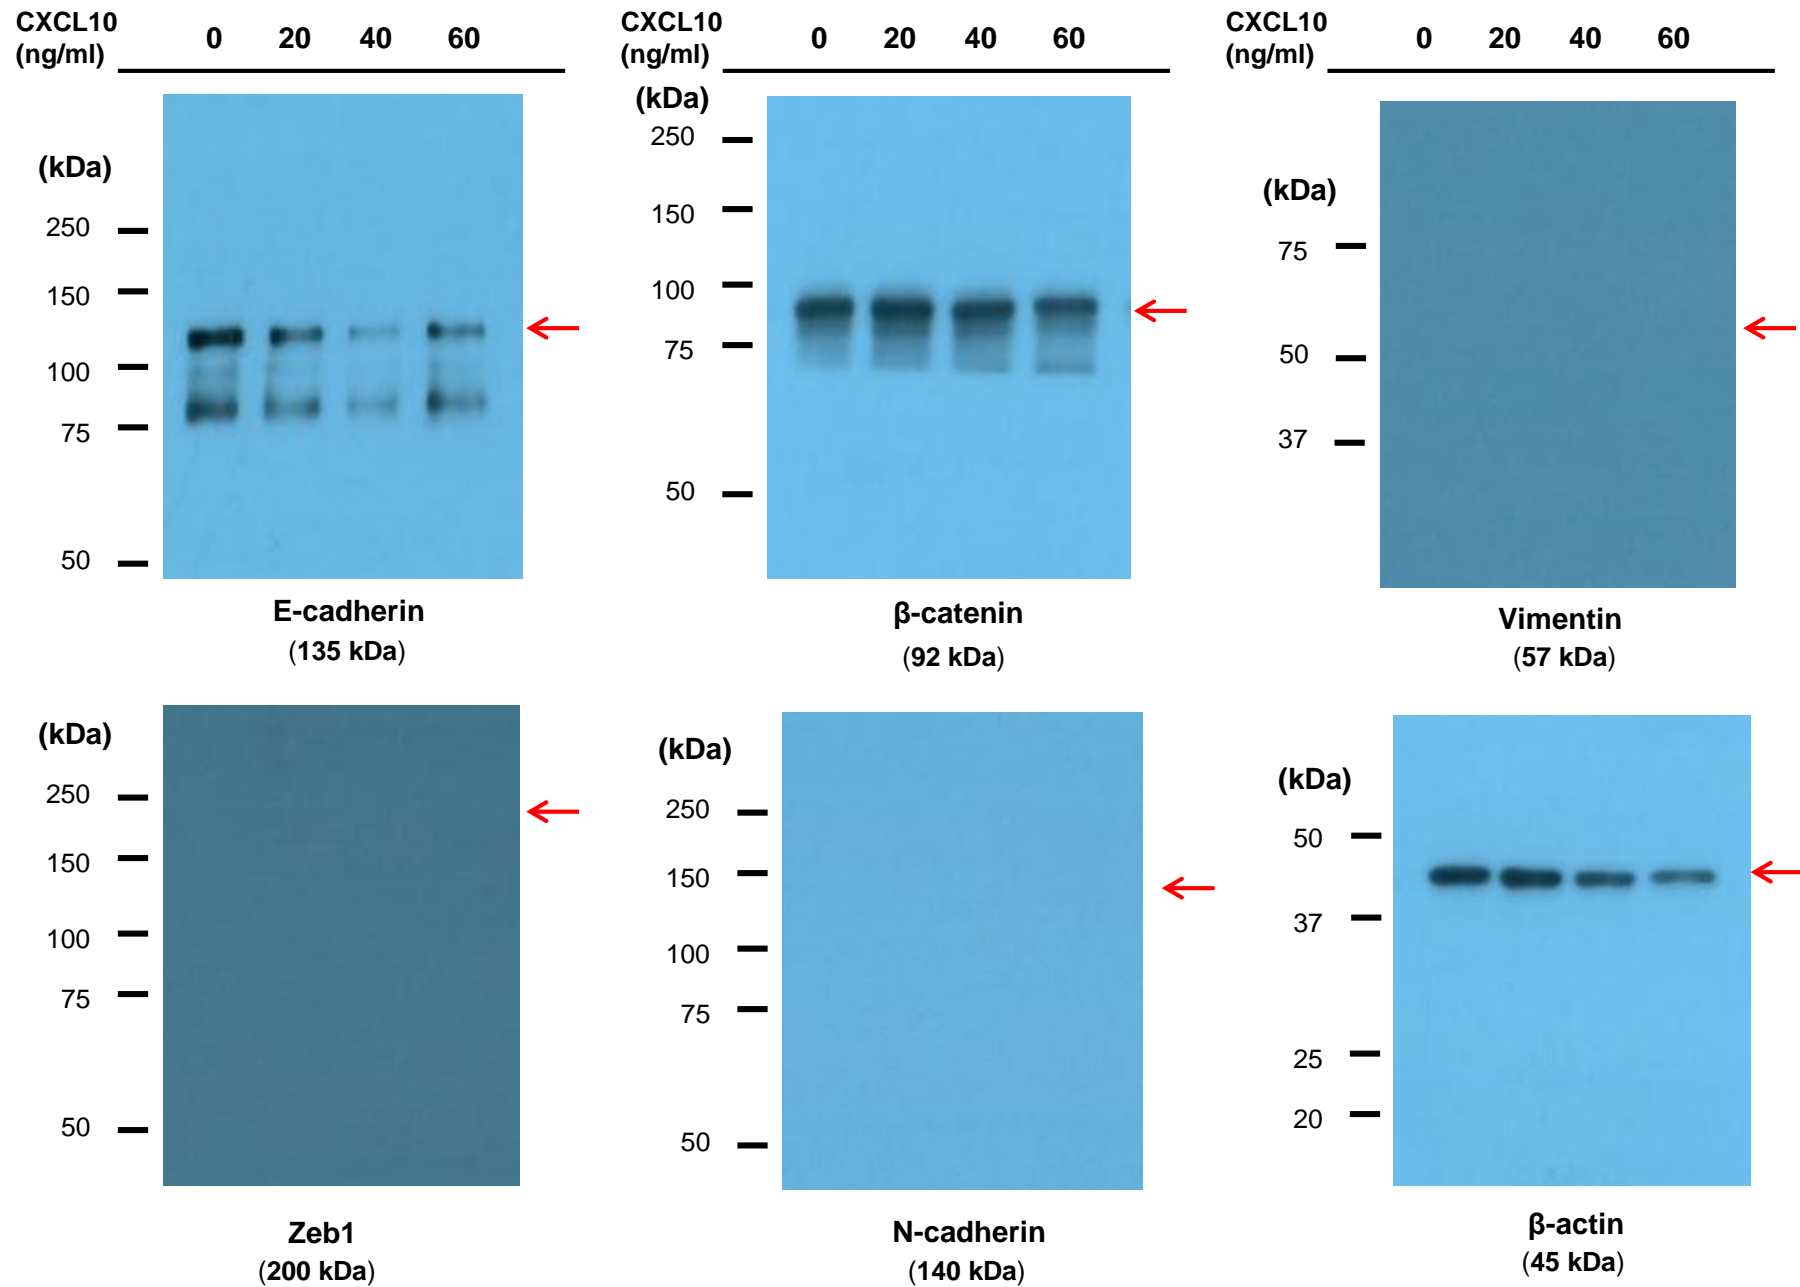

# MCF-7 cells (48 hours) - Western Blot

CXCL10 (ng/ml) 0 20 40 60

CXCL10 (ng/ml) 0 20 40 60

CXCL10 (ng/ml) 0 20 40 60

(kDa)

250 —  
150 —  
100 —  
75 —  
50 —

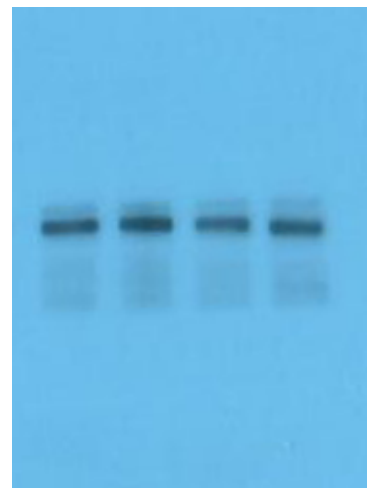

**E-cadherin**  
(135 kDa)

(kDa)  
250 —  
150 —  
100 —  
75 —  
50 —

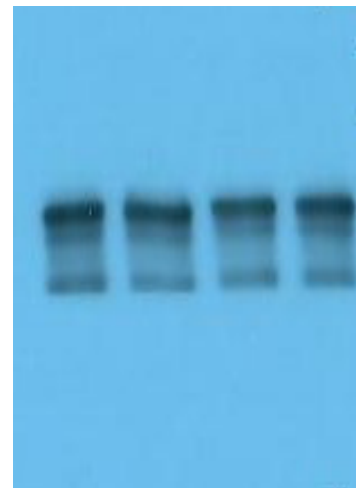

**β-catenin**  
(92 kDa)

(kDa)

75 —  
50 —  
37 —

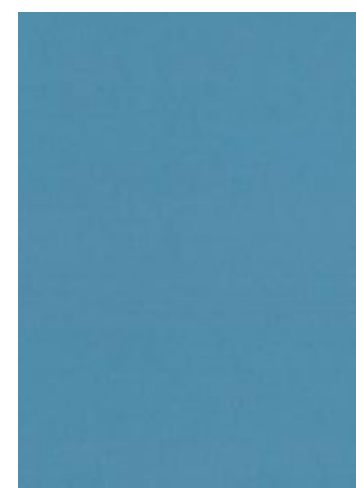

**Vimentin**  
(57 kDa)

(kDa)

250 —  
150 —  
100 —  
75 —  
50 —

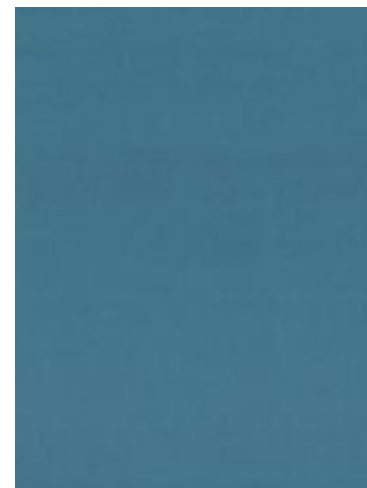

**Zeb1**  
(200 kDa)

(kDa)

250 —  
150 —  
100 —  
75 —  
50 —

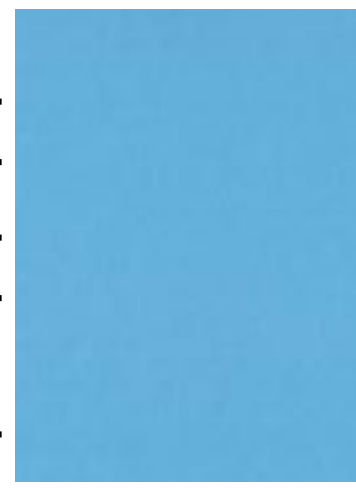

**N-cadherin**  
(140 kDa)

(kDa)

50 —  
37 —  
25 —  
20 —

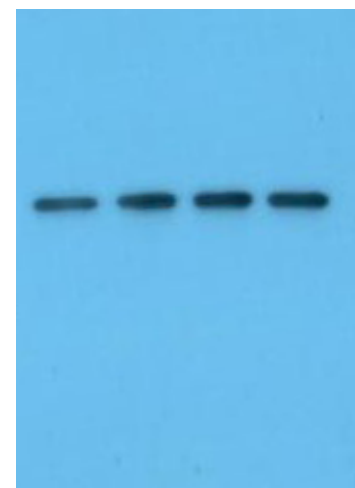

**β-actin**  
(45 kDa)

# MDA-MB-231 cells (24 hours) - Western Blot

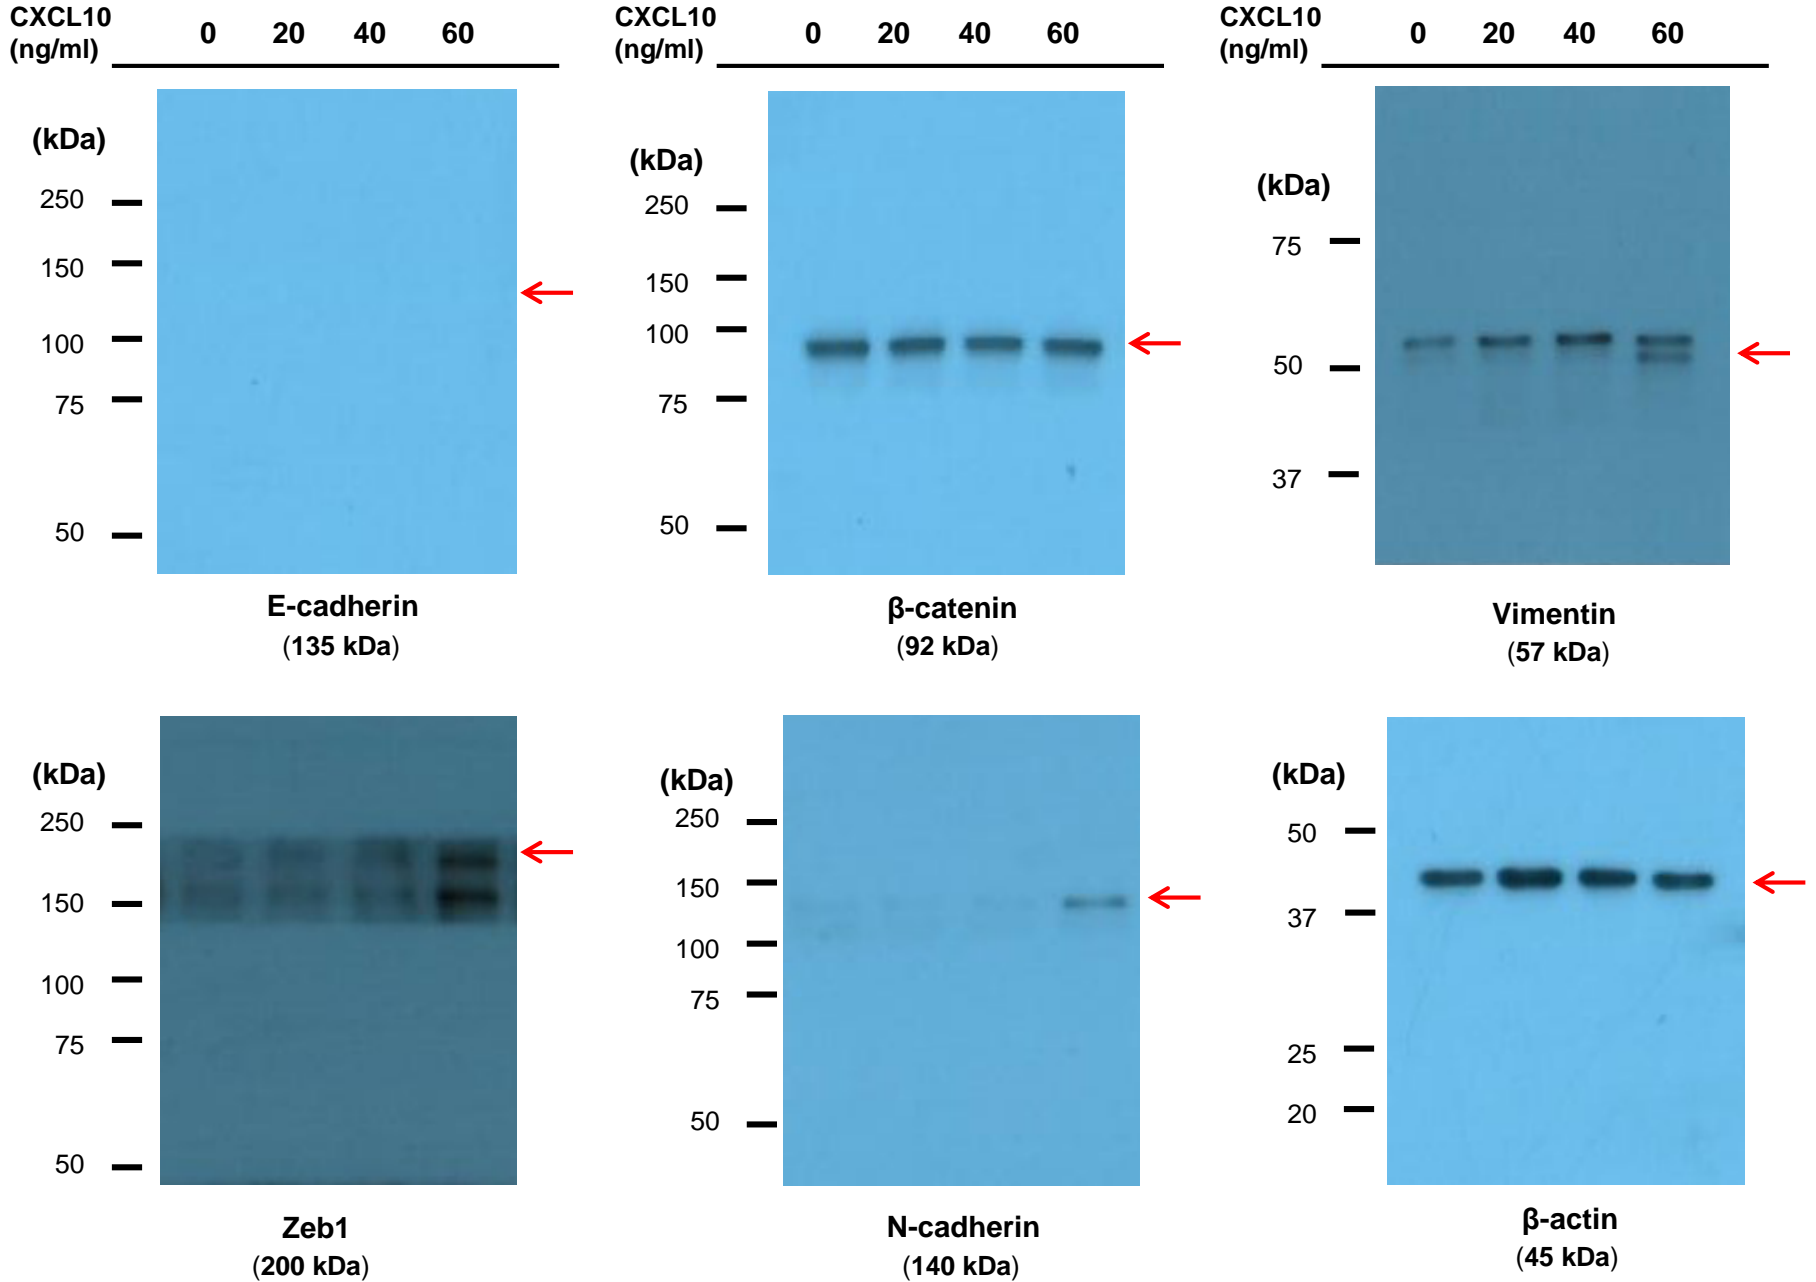

# MDA-MB-231 cells (48 hours) - Western Blot

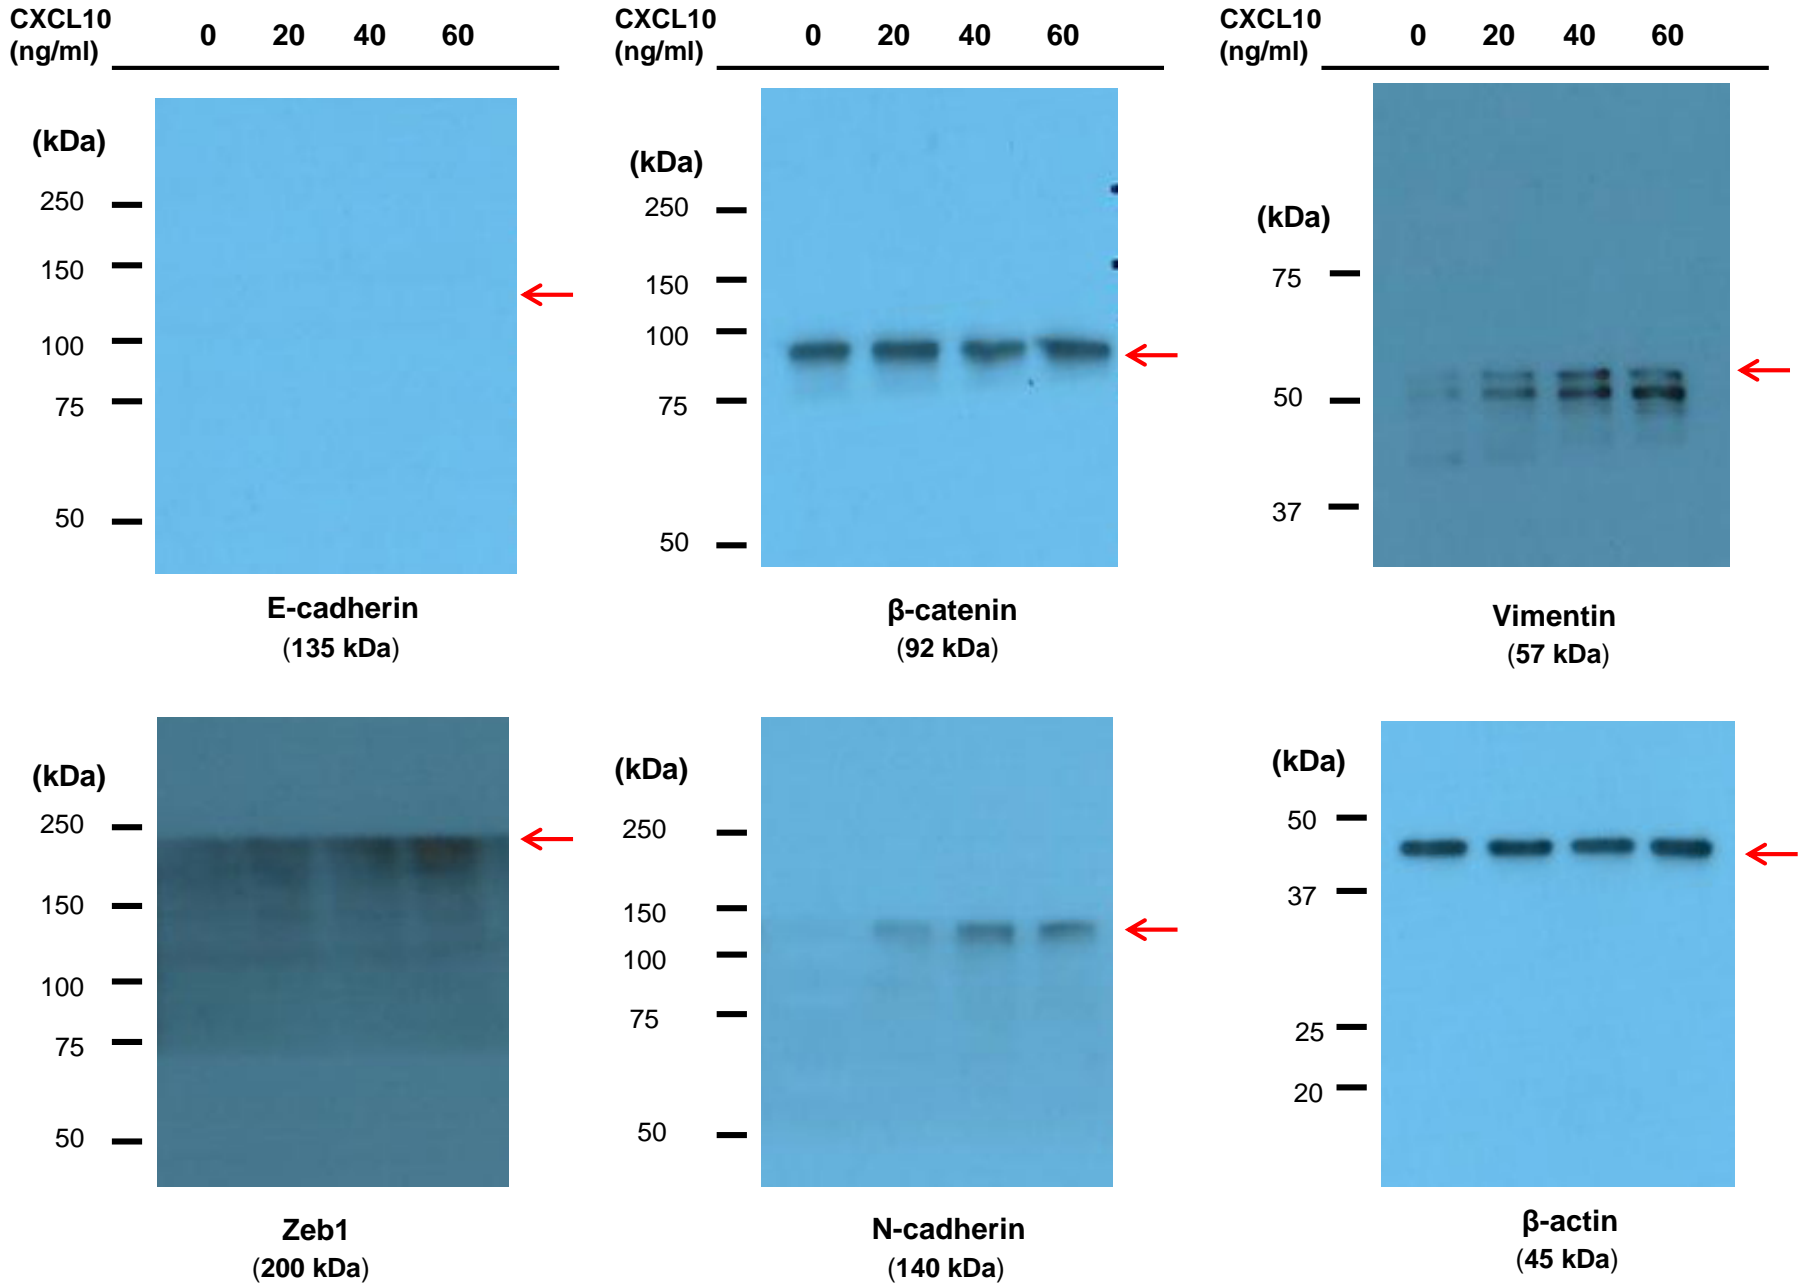

Supplement: 41598_2021_97390_MOESM1_ESM.pdf [file 41598_2021_97390_MOESM1_ESM.pdf]
